# Supplementary material
Source: publisher site journal article supplement (https://www.dovepress.com/article/140579)
Supplement: Supplementary file 1 [file get_supplementary_file.php%3Ff%3D140579.pdf]

## Supplementary materials

**Supplementary figure S1:** Number (A) and proportional growth over time (B) of publications overall, those containing the phrase “claims data”, and those with both terms “cancer” and “claims data”.

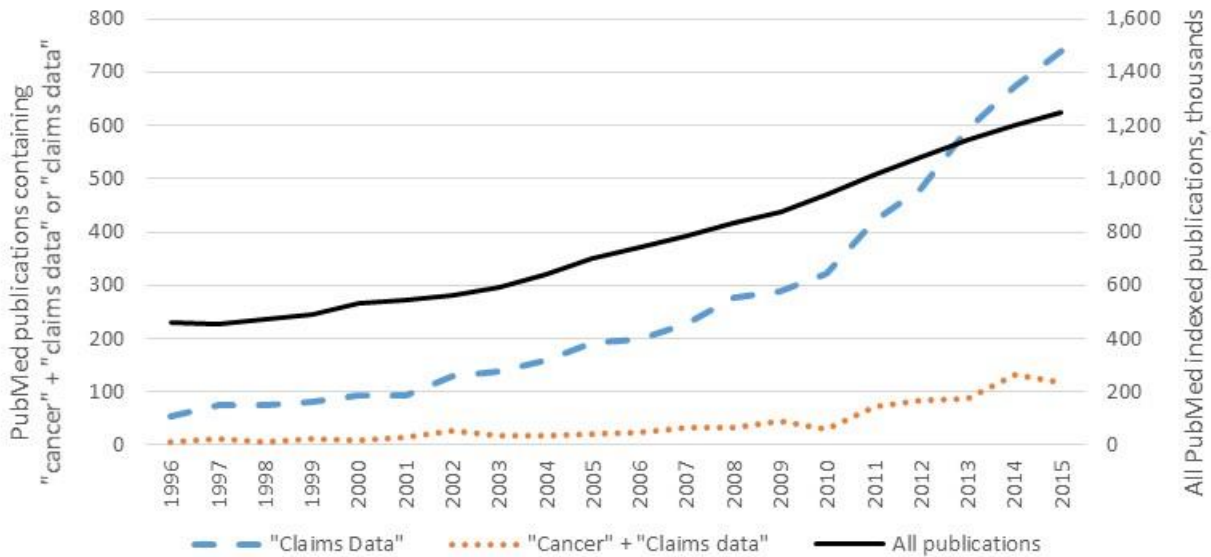

(A) As the use of claims data in research overall has grown significantly during the last 20 years, and more recently in the last 10 years for cancer research, specifically.

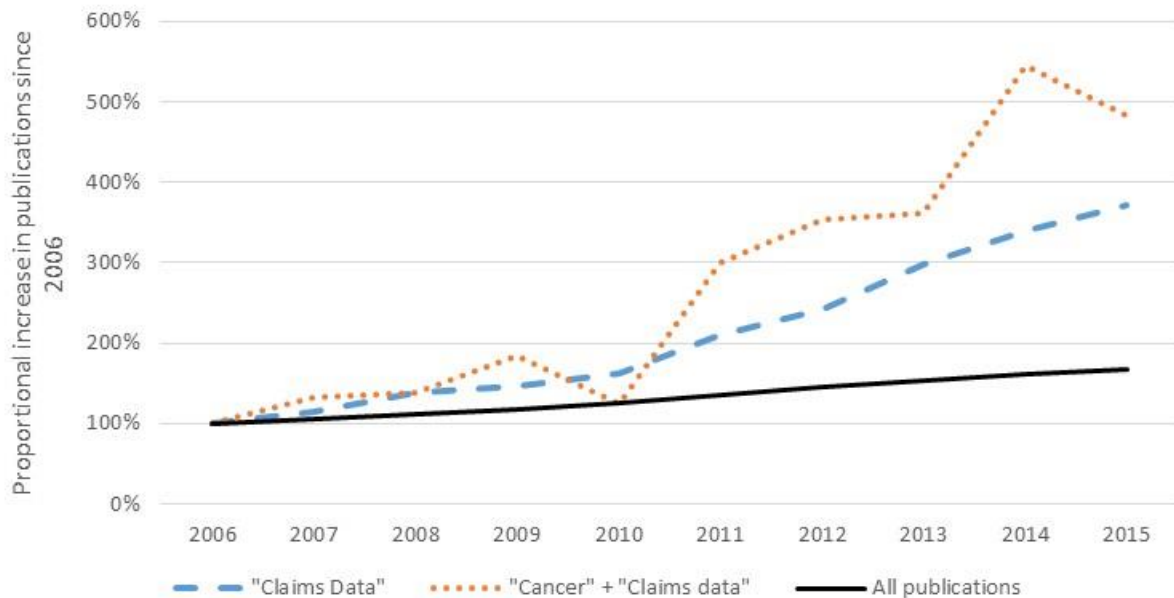

(B) In the last decade yearly publications of cancer research using claims data has grown 5-fold and those using claims data in general has grown nearly 4-fold, while publications in general have less than doubled.

Data used to create graphs was obtained from: <http://dan.corlan.net/medline-trend.html>

## MEDICAL RECORD ABSTRACTION FORM

### SECTION 1: BASIC PATIENT INFORMATION AND CANCER TYPE

**Q1: Chart ID:**

**Q2: Patient gender (Please choose ONLY ONE of the following option):**

- ☐ Male
- ☐ Female
- ☐ Not specified

**Q3: According to the medical chart, what cancer was the patient initially diagnosed with? (Please choose ONLY ONE of the following option):**

- ☐ Breast cancer (Go to SECTION 2)
- ☐ Lung cancer (Go to SECTION 3)
- ☐ Colorectal cancer (Go to SECTION 4)
- ☐ None of the above (End of the abstraction)
- ☐ Unknown/No cancer was diagnosed (End of the abstraction)

## SECTION 2: BREAST CANCER RELATED QUESTIONS

**Note: Please only fill out the questions in the section if “Breast Cancer” in Section 1, Q6 is selected. Otherwise, please skip this section.**

**Q1: According to the medical chart, what is the most recent stage (based on TNM staging) for the diagnosed breast cancer? (Please choose ONLY ONE of the following option)**

- ☐ Stage 0
- ☐ Stage I
- ☐ Stage II
- ☐ Stage III
- ☐ Stage IV
- ☐ Unknown / Not Documented

**Q2: According to the medical chart, what is the patient's most recent breast cancer stage (based on TNM staging) at a more granular level? (Please choose ONLY ONE of the following option)**

- ☐ Stage 0
- ☐ Stage I
- ☐ Stage IA
- ☐ Stage IB
- ☐ Stage IIA
- ☐ Stage IIB
- ☐ Stage IIIA
- ☐ Stage IIIB
- ☐ Stage IIIC
- ☐ Stage IV
- ☐ Unknown / Not Documented

**Q3: According to the medical chart, what is the status/result of the patient's ESTROGEN RECEPTOR test? (Please choose ONLY ONE of the following option)**

- ☐ Positive
- ☐ Negative
- ☐ Conflicting results
- ☐ Unknown/Test was not done/Results were not documented

**Q4: According to the medical chart, what is the status/result of the patient's PROGESTERONE RECEPTOR test? (Please choose ONLY ONE of the following option)**

- ☐ Positive
- ☐ Negative
- ☐ Conflicting results
- ☐ Unknown/Test was not done/Results were not documented

**Q5: According to the medical chart, what is the status/result of the patient's HER2 test? (Please choose ONLY ONE of the following option)**

- ☐ Positive
- ☐ Negative
- ☐ Equivocal
- ☐ Conflicting results
- ☐ Unknown/Test was not done/Results were not documented

**Q6: According to the medical chart, what is the patient's MENOPAUSAL status? (Please choose ONLY ONE of the following option)**

- ☐ Pre-menopausal
- ☐ Post-menopausal
- ☐ Peri-menopausal
- ☐ Conflicting results
- ☐ Unknown/ Status was not documented

### **SECTION 3: LUNG CANCER RELATED QUESTIONS**

***Note: Please only fill out the questions in the section if “Lung Cancer” in Section 1, Q6 is selected. Otherwise, please skip this section.***

**Q1: According to the medical chart, what is the most recent stage (based on TNM staging) for the diagnosed lung cancer? (Please choose ONLY ONE of the following option)**

- ☐ Stage 0
- ☐ Stage I
- ☐ Stage II
- ☐ Stage III
- ☐ Stage IV
- ☐ Limited
- ☐ Unknown / Not Documented

**Q2: According to the medical chart, what is the patient's most recent lung cancer stage (based on TNM staging) at a more granular level? (Please choose ONLY ONE of the following option)**

- ☐ Stage 0
- ☐ Stage IA
- ☐ Stage IB
- ☐ Stage IIA
- ☐ Stage IIB
- ☐ Stage IIIA
- ☐ Stage IIIB
- ☐ Stage IV
- ☐ Limited
- ☐ Unknown / Not Documented

**Q3: According to the medical chart, what is the patient's ALK mutation status? (Please choose ONLY ONE of the following option)**

- ☐ Positive
- ☐ Negative
- ☐ Conflicting results
- ☐ Unknown/Test was not done/Results were not documented

**Q4: According to the medical chart, what is the patient's EGFR mutation status? (Please choose ONLY ONE of the following option)**

- ☐ Wild type
- ☐ Mutation
- ☐ Conflicting results
- ☐ Unknown/Genotype was not documented

**Q5: According to the medical chart, what is the patient's histology classification for lung cancer? (Please choose ONLY ONE of the following option)**

- ☐ Small cell lung cancer
- ☐ Non-small cell lung cancer
- ☐ Conflicting results
- ☐ Unknown/Histology was not documented

## SECTION 4: COLORECTAL CANCER RELATED QUESTIONS

**Note: Please only fill out the questions in the section if “Colorectal Cancer” in Section 1, Q6 is selected. Otherwise, please skip this section.**

**Q1: According to the medical chart, what is the most recent stage (based on TNM staging) for the diagnosed colorectal cancer? (Please choose ONLY ONE of the following option)**

- ☐ Stage 0
- ☐ Stage I
- ☐ Stage II
- ☐ Stage III
- ☐ Stage IV
- ☐ Unknown / Not Documented

**Q2: According to the medical chart, what is the patient's most recent colorectal cancer stage (based on TNM staging) at a more granular level? (Please choose ONLY ONE of the following option)**

- ☐ Stage 0
- ☐ Stage I
- ☐ Stage IIA
- ☐ Stage IIB
- ☐ Stage IIC
- ☐ Stage IIIA
- ☐ Stage IIIB
- ☐ Stage IIIC
- ☐ Stage IV
- ☐ Stage IVA
- ☐ Stage IVB
- ☐ Unknown / Not Documented

**Q3: According to the medical chart, what is the patient's KRAS genotype? (Please choose ONLY ONE of the following option)**

- ☐ Wild type
- ☐ Mutation
- ☐ Conflicting results
- ☐ Unknown/Genotype was not documented



**Supplementary Data: Cross tabulation of all cancer stage and biomarker status data according to the medical record and the HIRE-Oncology (HIRE-O)**

**A. Breast Cancer**

| Cancer Stage |     | Medical Record |    |     |     |    |         | Total |
|--------------|-----|----------------|----|-----|-----|----|---------|-------|
|              |     | 0              | I  | II  | III | IV | Missing |       |
| HIRE-O       | 0   | 0              | 0  | 1   | 0   | 0  | 0       | 1     |
|              | I   | 0              | 45 | 3   | 0   | 0  | 3       | 51    |
|              | II  | 0              | 6  | 90  | 3   | 1  | 7       | 107   |
|              | III | 0              | 4  | 10  | 25  | 2  | 2       | 43    |
|              | IV  | 0              | 4  | 6   | 3   | 81 | 4       | 98    |
| Total        |     | 0              | 59 | 110 | 31  | 84 | 16      | 300   |

| Estrogen Receptor |          | Medical Record |          |         | Total |
|-------------------|----------|----------------|----------|---------|-------|
|                   |          | Positive       | Negative | Missing |       |
| HIRE-O            | Positive | 193            | 3        | 10      | 206   |
|                   | Negative | 5              | 77       | 4       | 86    |
|                   | Missing  | 2              | 5        | 1       | 8     |
| Total             |          | 200            | 85       | 15      | 300   |

| Progesterone Receptor |          | Medical Record |          |         | Total |
|-----------------------|----------|----------------|----------|---------|-------|
|                       |          | Positive       | Negative | Missing |       |
| HIRE-O                | Positive | 137            | 14       | 13      | 164   |
|                       | Negative | 6              | 104      | 9       | 119   |
|                       | Missing  | 7              | 9        | 1       | 17    |
| Total                 |          | 150            | 127      | 23      | 300   |

| HER2   |           | Medical Record |          |           |         | Total |
|--------|-----------|----------------|----------|-----------|---------|-------|
|        |           | Positive       | Negative | Equivocal | Missing |       |
| HIRE-O | Positive  | 90             | 5        | 1         | 8       | 104   |
|        | Negative  | 4              | 170      | 3         | 9       | 186   |
|        | Equivocal | 3              | 6        | 0         | 1       | 10    |
|        | Missing   | 0              | 0        | 0         | 0       | 0     |
| Total  |           | 97             | 181      | 4         | 18      | 300   |

Highlighted areas in all tables indicates non-missing data for which the validation analysis was conducted

## B. Lung Cancer

| Cancer Stage |         | Medical record |   |    |     |     |         |         | Total |
|--------------|---------|----------------|---|----|-----|-----|---------|---------|-------|
|              |         | 0              | I | II | III | IV  | Limited | Missing |       |
| HIRE-O       | 0       | 0              | 0 | 0  | 0   | 1   | 0       | 0       | 1     |
|              | I       | 0              | 0 | 0  | 0   | 0   | 0       | 1       | 1     |
|              | II      | 0              | 0 | 3  | 0   | 1   | 0       | 0       | 4     |
|              | III     | 0              | 0 | 0  | 17  | 2   | 2       | 0       | 21    |
|              | IV      | 0              | 0 | 1  | 10  | 152 | 2       | 2       | 167   |
|              | Limited | 0              | 0 | 0  | 0   | 0   | 3       | 0       | 3     |
| Total        |         | 0              | 0 | 4  | 27  | 156 | 7       | 3       | 197   |

| ALK Mutation |          | Medical Record |          |         | Total |
|--------------|----------|----------------|----------|---------|-------|
|              |          | Positive       | Negative | Missing |       |
| HIRE-O       | Positive | 7              | 6        | 4       | 17    |
|              | Negative | 0              | 61       | 12      | 73    |
|              | Missing  | 0              | 25       | 82      | 107   |
| Total        |          | 7              | 92       | 98      | 197   |

| EGFR Mutation |           | Medical Chart (Reference) |           |         | Total |
|---------------|-----------|---------------------------|-----------|---------|-------|
|               |           | Mutation                  | Wild Type | Missing |       |
| HIRE-O        | Mutation  | 13                        | 2         | 6       | 21    |
|               | Wild Type | 0                         | 54        | 9       | 63    |
|               | Missing   | 3                         | 35        | 75      | 113   |
| Total         |           | 16                        | 91        | 90      | 197   |

| Pathology |                | Medical Chart (Reference) |     |         | Total |
|-----------|----------------|---------------------------|-----|---------|-------|
|           |                | SC                        | NSC | Missing |       |
| HIRE-O    | Small cell     | 22                        | 2   | 0       | 24    |
|           | Non-small cell | 4                         | 146 | 4       | 154   |
|           | Missing        | 3                         | 15  | 1       | 19    |
| Total     |                | 29                        | 163 | 5       | 197   |

Highlighted areas in all tables indicates non-missing data for which the validation analysis was conducted

**C. Colorectal  
Cancer**

| Cancer Stage |     | Medical Record |   |    |     |     |         | Total |
|--------------|-----|----------------|---|----|-----|-----|---------|-------|
|              |     | 0              | I | II | III | IV  | Missing |       |
| HIRE-O       | 0   | 0              | 0 | 0  | 0   | 2   | 0       | 2     |
|              | I   | 0              | 0 | 0  | 1   | 0   | 0       | 1     |
|              | II  | 0              | 0 | 4  | 1   | 0   | 0       | 5     |
|              | III | 0              | 0 | 0  | 19  | 3   | 0       | 22    |
|              | IV  | 0              | 0 | 0  | 5   | 160 | 2       | 167   |
| Total        |     | 0              | 0 | 4  | 26  | 165 | 2       | 197   |

| KRAS mutation |           | Medical Record |          |         | Total |
|---------------|-----------|----------------|----------|---------|-------|
|               |           | Wild Type      | Mutation | Missing |       |
| HIRE-O        | Wild Type | 71             | 3        | 15      | 89    |
|               | Mutation  | 3              | 37       | 5       | 45    |
|               | Missing   | 6              | 8        | 49      | 63    |
| Total         |           | 80             | 48       | 69      | 197   |

Highlighted areas in all tables indicates non-missing data for which the validation analysis was conducted
